# Supplementary material for: An Alternative View of Familial Alzheimer’s Disease Genetics
Source: Preprints.org preprint supplement (doi:10.20944/preprints202303.0476.v2), 2023-04-23
Supplement: Supplementary file 2 [file supplementary]

## Sheet: Spreadsheet 1
Supplementary Data File 1, Spreadsheet 1
Data copied from Petit et al. [2] supplementary Table S2 with SDs removed and AAOs added from Table 1 of the paper (with ranges removed)
	Mutation	Aβ37 [%]	Aβ38 [%]	Aβ40 [%]	Aβ42 [%]	Aβ43 [%]		AAO from		(37 + 38 + 40) /		(37 + 40 + 43) /
	PSEN1							Table 1		(42 + 43)		(38 + 42)
	L166P	2.76	14.12	23.14	55.58	4.4		23.5		0.667222		0.43472
	M233V	4.11	18.26	31.17	46.02	0.43		24.8		1.15264		0.555538
	M233I	5.69	12.06	39.45	42.25	0.55		27		1.33645		0.841282
	L381F	6.2	13.03	44.03	24.64	12.09		29.8		1.7223		1.65437
	I143T	6.02	29.39	41.45	23.01	0.13		31.9		3.32152		0.908397
	L235P	4.32	3.92	65.01	24.93	1.82		32.5		2.73832		2.4662
	G384A	0	15.41	62.25	22.35	0		36		3.47472		1.64857
	Y115H	6.91	8.43	59.37	23.63	1.67		37		2.95296		2.11946
	R278T	1.1	6.56	63.69	24.96	3.69		37		2.4904		2.17259
	L166R	3.2	2.55	64.42	24.55	5.29		37.3		2.35154		2.69041
	L171P	3.64	4.28	62.65	29.44	0		38		2.39708		1.9659
	A431E	2.18	3.76	72.32	13.89	7.85		39.4		3.59982		4.66572
	M139V	5.94	10.59	60.64	22.12	0.71		39.9		3.3802		2.05717
	Ins113T	2.73	6.31	72.31	17.78	0.87		42.1		4.36193		3.1511
	L282R	1.32	3.96	79.66	13.53	1.53		43.8		5.64011		4.71755
	G266S	2.37	1.74	67.78	18.86	9.26		45		2.55654		3.85485
	M139T	8.11	10.84	62.25	18.21	0.6		47.3		4.31685		2.44269
	L235V	10.35	9.99	65.69	12.77	1.21		47.4		6.15379		3.39411
	E280A	2.34	10.67	71.5	14.78	0.71		48.1		5.45578		2.92927
	F105C	5.79	10.07	74.31	9.83	0		48.6		9.17294		4.02513
	V89L	2.81	11.74	70.49	14.66	0.3		48.7		5.68449		2.78788
	A246E	4.13	11.08	68.11	16.37	0.31		49.1		4.9952		2.64299
	I143F	1.88	22.06	61.85	14.07	0.14		55		6.0373		1.76778
	R269H	2.29	7.68	77.29	12.51	0.24		56.4		6.84392		3.95344
	A79V	2.53	15.85	69.46	11.84	0.32		60.6		7.22368		2.61141
	L113P	11.33	10.76	48.39	29.51	0
	S132A	4.98	13.58	72.2	9.21	0.03				Linear		Linear
	V142I	4.28	11.73	66.48	17.51	0				correlation		correlation
	Y154N	2.3	6.14	69.62	15.42	6.52				r2 with AAO		r2 with AAO
	G266C	4.87	3.69	76.83	14.61	0				0.750708		0.378428
	L282P	1.58	3.26	77.19	16.66	1.3
	T291P	1.58	12.2	59.94	21	5.28				Common &		One
	V393F	2.8	7.34	74.38	14.9	0.58				"Incomplete"		"product line"
	V412I	5.7	17.29	67.77	9.03	0.21				relative to		relative to
	P433S	0	3.69	43.55	18.57	34.18				"complete"		the other
										cleavage
	R35Q	3.37	11.44	74.84	10.28	0.07
	E318G	3.32	11.7	73.86	11.06	0.06

## Sheet: Spreadsheet 2
	Supplementary Data File 1, Spreadsheet 2
	Data from Liu et al 2022 [101], "TABLE 1 Aβs secretion from PS dKO293 cells co-transfected with WT or mutant PSEN1 and APP-C99 (pg/mL)"
			130 mutations of PSEN1.		~31 produce more Abeta in total than the highest WT (highlighted with their Age At Onset, AAO, in brown).
					Yellow highligting indicates mutations found by Sun et al. [98] to produce more Aβ x-40 + Aβ x-42 than WT.
		AAO (yrs)	Aβ x-37	Aβ x-38	Aβ x-39	Aβ x-40	Aβ x-42	Aβ x-43	Total Aβ	Aβ x-40 + Aβ x-42
	WT-PSEN1		1546.54	1478.58	947.71	19945.5	1832.06	28.05	25778.4	21777.6
	WT-PSEN1		1424.56	1521.39	846.68	20513.2	2026.34	31.15	26363.4	22539.6
	WT-PSEN1		1367.12	1368.03	863.4	16696.3	1745.9	20.95	22061.7	18442.2
	D40del (delGAC)	48	1492.97	1636.89	1072.35	20615.2	1988.16	34.76	26840.4	22603.4
	E69D	55	976.9	1123.85	704.64	13673.4	1319.32	22.52	17820.6	14992.7
	A79V	53	605.65	1543.53	610.41	13206	1589.18	35.9	17590.7	14795.2
	V82L	53	398.56	639	740	27083.2	2073.23	284.99	31219	29156.4
	I83T	55	672.28	907.3	593.69	16218.2	2051.43	40.15	20483.1	18269.6
	L85P	20	290.93	468.71	444.23	11828	2620.52	363.14	16015.5	14448.5
	V89L (G > C)	46	625.01	1407.48	644.92	14485.8	2403.17	43.1	19609.4	16888.9
	C92S	53.5	794.28	1226.15	877.23	26838.9	4006.24	56.56	33799.3	30845.1
	V94M	53	981.35	1062.39	621.72	12736.5	1270.96	27.14	16700.1	14007.5
	V96F	52.5	711.19	0	683.74	15341	3403.84	48.53	20188.3	18744.9
	V97L	36.5	922.72	1036.18	813.71	17445.8	2012.16	29.87	22260.5	19458
	T99A	43	1392.16	1650.27	985.7	25047.8	2916.71	56.56	32049.2	27964.5
	F105I	53	925.33	1131.9	1073.06	20655.2	2999.07	45.89	26830.5	23654.3
	F105V	52	717.59	849.09	906.59	17628.2	2347.69	41.16	22490.3	19975.9
	L113P	43	648.77	434.2	971.31	6215.5	1515.77	11.93	9797.48	7731.27
	Y115D	29	642.87	1292.59	1171.87	19089.4	9167.92	109.59	31474.2	28257.3
	Y115H	35	438.87	405.68	558.27	6179.35	1526.73	34.76	9143.66	7706.08
	T116N	35	612.2	815.37	686.76	9435.6	2464.06	22.52	14036.5	11899.7
	T116I	48	528.93	1395.08	605.99	9469.68	2122.29	11.93	14133.9	11592
	T116R	35	317.01	318.65	412.02	8548.74	5111.09	178.09	14885.6	13659.8
	P117A	35	177.26	393.95	246.03	3299.15	1278.66	22.52	5417.57	4577.81
	P117L	30.25	622.35	1100.84	740.94	14392.2	4989.74	44.97	21891	19381.9
	E120D (A > T)	48	920.11	1462.01	1015.48	22045.6	3963.11	51.06	29457.3	26008.7
	E120K	39	394.08	389.6	548.73	14054.5	6895.07	127.82	22409.8	20949.6
	I83_M84del	36	406.87	759.44	590.3	26730.1	5044.51	733.95	34265.2	31774.6
	E120G	30	77.07	160.1	249.06	2583.38	801.98	11.93	3883.52	3385.36
	L134R	53	1204.35	2090.92	927.85	24127.9	3780.8	58.05	32189.9	27908.7
	N135D	35	297.76	407.35	504.9	8317.6	1951.06	44.05	11522.7	10268.7
	N135Y	32	477.9	355.12	444.23	11388.1	5490.94	231.68	18388	16879
	N135S	33	209.07	232.58	264.49	5361.16	1807.99	48.53	7923.82	7169.15
	M139T	49	807.04	859.8	812.83	13961.8	2062.33	27.14	18530.9	16024.1
	M139I	37	1577.28	1005.53	2096.57	18302.2	3898.4	20.78	26900.7	22200.6
	M139K	37	396.88	481.47	298.63	10517	1754.42	58.79	13507.2	12271.4
	M139V	41	1266.82	723.21	1289.09	15074.8	3165.84	32.4	21552.2	18240.7
	I143N	47.5	432.78	1275.87	279.24	4485.32	1958.7	18.92	8450.83	6444.02
	I143M	50	464.09	1087.71	384.61	8034.8	1499.32	11.93	11482.5	9534.12
	I143V	55	789.77	1354.78	679.03	12497.6	1911.76	29.87	17262.8	14409.4
	I143T	35	591.71	1094.57	441.38	7771.47	2244.3	20.78	12164.2	10015.8
	I143F	55	349.38	893.97	355.55	9068.61	1247.87	18.92	11934.3	10316.5
	M146V	40	583.19	985.19	563.38	17117.3	2609.66	34.76	21893.5	19727
	M146I	45	492.76	967.76	512.13	14485.8	2040.52	34.76	18533.7	16526.3
	M146L	43	392.49	604.9	377.11	9150.66	1670.19	14.58	12209.9	10820.9
	TI47I	42	508.29	1089.76	1340.52	7827.06	2536.88	0	13302.5	10363.9
	T147P	32	1179.1	1362.78	899.59	23960.3	2068.87	41.16	29511.8	26029.2
	L150P	60	584.89	3256.36	524.7	25857.2	2927.55	921.04	34071.8	28784.8
	L153V	36	608.59	1164.25	656.1	18447.8	4692.06	58.79	25627.6	23139.9
	Y154C	41	255.54	384.73	365.07	7412.62	975.66	430.89	9824.51	8388.28
	Y154N	40	265.76	581.63	423.46	18960.1	3110.63	434.89	23776.5	22070.7
	H163P	33	237.08	405.68	422.48	13600.9	4220.69	91.26	18978.1	17821.6
	H163R	45	251.5	524.26	379.27	10482.9	1736.93	24.14	13399	12219.8
	H163Y	47	327.94	705.57	463.32	12615.9	1657.06	28.53	15798.3	14272.9
	A164V	75	926.58	840.14	590.3	11165.2	973.45	16.87	14512.5	12138.6
	W165G	36	1277.43	1037.67	3563.53	24429.2	7449.12	52.68	37809.7	31878.3
	W165C	42	3089.53	1182.58	4801.76	27899.2	5727.84	46.78	42747.7	33627.1
	L166del	38	411.36	753.14	932.06	8040.98	1879	20.78	12037.3	9919.98
	L166V	42	112.13	172.27	242.97	4767.79	885.02	38.08	6218.26	5652.81
	L166H	30	397.63	5249.21	589.92	16246.3	9568.57	59.51	32111.2	25814.9
	L166R	37	361.47	366.21	345.24	13135.1	3096.55	763.49	18068.1	16231.7
	L166P	15	212.08	219.58	335.86	4949.36	2087.41	464.24	8268.53	7036.77
	I167del	38	1279	2180.4	1938.94	26983.9	5831.77	44.97	38259	32815.7
	S169del	42	985.42	1991.05	1924.98	30664.7	7890.59	63.03	43519.8	38555.3
	S169L	31	813.09	704.49	546.32	11730.8	5266.73	35.9	19097.3	16997.5
	S169P	31	1871.47	1792.84	2431.81	19077.6	8039.78	33.6	33247.1	27117.4
	L171P	38	642.68	368.7	2139.92	12098.5	2021.98	22.52	17294.3	14120.5
	L173F	50	1028.02	294.91	568.07	8773.8	1389.61	0	12054.4	10163.4
	L173W	26	1318.53	422.16	553.12	12811.2	8435.97	34.76	23575.8	21247.2
	L174R	48	414.82	297.41	371.68	15295	5171.21	140.98	21691.1	20466.2
	L174M	59	537.24	2396.63	351.57	12942.8	1995.8	55.04	18279.1	14938.6
	F175S	61	1165.51	2226.42	1157.34	21737.7	2870.09	28.53	29185.6	24607.8
	F176L	51	921.78	1313.38	726.7	19432.5	2001.19	16.49	24412.1	21433.7
	F177S	30	990.85	690.97	1348.35	13573.6	5504.69	29.59	22138.1	19078.3
	E184D	42	717.46	1011.29	850.15	20280.7	3278.52	32.5	26170.6	23559.2
	I202F	54	1040.8	1006.18	974.83	14710.4	1736.55	6.32	19475.1	16447
	G206A	55	523.71	608.72	484.22	7659.71	988.51	0	10264.9	8648.22
	G206D	33	494.56	715.02	762.56	10576.9	1911.97	13.84	14474.8	12488.8
	G206V	30	415.64	274.91	805.78	6768.73	2207.52	0	10472.6	8976.25
	G206S	32	503.19	583.25	956.78	9633.85	2263.48	16.49	13957	11897.3
	G209R	46	251.15	230.13	207.53	5293.68	2729.45	179.81	8891.75	8023.13
	G209V	41.3	456.36	362.49	368.53	12096.3	4470.52	32.5	17786.7	16566.8
	G209A	40	483.64	647.15	703.74	9594.65	2605.26	16.49	14050.9	12199.9
	G209E	43	167.36	189.48	235.89	2397.42	575.8	0	3565.95	2973.22
	S212Y	46.5	618.8	917.03	608.23	15112.3	2165.02	31.08	19452.4	17277.3
	I213F	33	342.8	364.18	484.64	24415.8	6829.26	241.09	32677.8	31245.1
	I213T	45	855.43	623.9	515.66	14708.2	1533.98	16.49	18253.6	16242.1
	H214N	46	449.95	893.03	506.84	12122.8	1868.39	24.71	15865.7	13991.2
	H214Y	41	360.04	622.25	425.59	11447.3	1480.97	16.49	14352.6	12928.2
	H214D	55	733.53	520.54	468.51	11869.3	1260.43	22.89	14875.2	13129.7
	G217D	36	776.16	1110.67	827.8	24482.5	3745.34	69.84	31012.3	28227.8
	Q222H	35	500.79	721.01	762.56	25424.6	4361.24	117.52	31887.7	29785.9
	L226F	33	136.43	174.33	164.86	5117.69	1294.78	28.05	6916.14	6412.47
	S230R	58	385.87	332.75	292.65	6804.69	796.47	31.08	8643.51	7601.16
	A231P	53	466.69	500.92	571.04	22119.8	3315.71	115.61	27089.7	25435.5
	A231T	52	397.03	472.37	264.48	8509.63	968.69	0	10612.2	9478.32
	M233T	38	1123.48	2991.78	1028.37	8485.56	3937.3	6.32	17572.8	12422.9
	M233I	28	635.86	1110.79	884	14164.6	6142.56	0	22937.8	20307.2
	M233V	31	263.95	478.7	336.58	4338.23	1683.59	0	7101.05	6021.82
	M223L	46	219.33	350.14	114.42	5375	837.2	0	6896.09	6212.2
	L235P	33	187.19	246.83	235.14	8136.71	1879.8	36.49	10722.2	10016.5
	L235R	45	214.79	233.25	202.49	6802.44	1949.32	80.86	9483.15	8751.76
	L235V	47	683.34	594.37	590.23	11412.5	1464.33	26.42	14771.2	12876.8
	F237I	46	514.98	384.37	281.78	8452.47	874.79	0	10508.4	9327.26
	F237L	47	752.22	533.15	431.61	11610.6	1311.43	18.83	14657.9	12922.1
	Q223R	33	401.42	553.44	619.65	27309.2	5861.76	1393.9	36139.4	33170.9
	L248P	42	792.17	1158.82	877	20660.4	4487.02	35.2	28010.6	25147.4
	L248R	54	488.43	376.11	311.66	8624.73	906.1	6.32	10713.4	9530.83
	A246P	47	542.04	894.98	708.99	17439.5	6312.23	88.96	25986.7	23751.7
	Y256S	25	692.23	1315.93	352.04	10432.7	3902.22	799.69	17494.8	14334.9
	P267A	45	918.07	1402.97	867.08	31142.1	4543.71	91.33	38965.3	35685.8
	P267L	59	438.28	384.17	237.39	9861.54	1021.88	16.49	11959.8	10883.4
	P267S	35	220.75	270.81	225.98	8621.72	1860.09	69.84	11269.2	10481.8
	R278I	50	164.81	164.07	193.86	2787.89	351.31	212.18	3874.12	3139.2
	R278S	39	144.06	299.88	159.79	6151.93	1206.3	182.45	8144.41	7358.23
	R278T	37	171.79	328.12	205.02	7183.98	1465.37	256.96	9611.24	8649.35
	R278K	40	169.53	437.78	162.85	9649.68	1741.75	239.27	12400.9	11391.4
	E280A	48	418.7	904.1	485.47	14425	2706.68	76.2	19016.1	17131.6
	E280K	48	687.49	1402.97	604.03	20808.6	2943.58	99.25	26545.9	23752.2
	L282R	43	209.49	303.56	240.36	11095.8	1089.63	133.66	13072.5	12185.4
	L282V	44.3	619.28	739.3	708.69	30128	4166.33	62.94	36424.6	34294.4
	L282F	49	474.06	539.66	517.65	26497.8	2517.26	118.47	30664.9	29015.1
	V272A	31	402.85	315.84	301.35	16799.1	3407.66	80.21	21307	20206.7
	V272D	43	249.44	207.12	196.48	5926.89	782.89	117.52	7480.34	6709.78
	F386S	48	289.09	491.61	355.28	14768.9	3907.38	612.41	20424.7	18676.3
	F388L	43	609.74	466.37	361.16	10166.3	1088.59	13.84	12706	11254.9
	F386I	50	268.88	447.98	221.29	8340.43	1581.78	69.1	10929.5	9922.21
	G384A	34	384.43	434.87	221.29	5354.11	1784.31	124.01	8303.02	7138.42
	L424F	57	930.85	1089.01	646.99	19611.9	2465.48	40.14	24784.4	22077.4
	L424H	40	386.82	489.22	477.47	19637.8	4384.95	121.72	25498	24022.8
	L424R	33	240.06	363.55	232.88	13284	3529.54	154.05	17804.1	16813.5
	L424V	30	434.27	587.81	515.66	26126.4	4094.13	195.17	31953.5	30220.6
	E318G	61	988.89	1063.06	555.84	12872.5	1213.58	16.49	16710.3	14086.1
	E9 Del	45	210.15	345.4	192.1	6476.67	1207.34	173.08	8604.74	7684.01
